# Supplementary material for: The weather diary of Georg Christoph Eimmart for Nuremberg, 1695–1704
Source: Copernicus journal article supplement (doi:10.5194/cp-19-1345-2023), 2023-07-11
Supplement: Supplementary file 1 [file cp-19-1345-2023-supplement.zip]

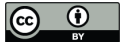

## *Supplement of*

# **The weather diary of Georg Christoph Eimmart for Nuremberg, 1695–1704**

**Stefan Brönnimann**

*Correspondence to:* Stefan Brönnimann ([stefan.broennimann@giub.unibe.ch](mailto:stefan.broennimann@giub.unibe.ch))

- cp-19-1345-2023-supplement-title-page.pdf
- DOCU\_CLIM\_Summer1695.txt
- Eimmart\_Diary.xlsx
- Europe\_T2\_DE\_Jena\_1702\_subdaily.xls
- Europe\_T2\_RU\_Kaliningrad\_1702\_subdaily.xls
- KNMI\_KNMI-50\_Leiden-Senguerdius\_16970202-16981231\_p.tsv
- PALAEO-RA\_Europe\_Jena\_17020101-17021231\_p\_daily.tsv
- PALAEO-RA\_Europe\_Kaliningrad\_17020101-17021231\_p\_daily.tsv
- PALAEO-RA\_Europe\_Nuernberg\_17320101-17431231\_dd.tsv
- PALAEO-RA\_Europe\_Nuernberg\_17320101-17431231\_p.tsv
- PALAEO-RA\_Kanold\_Nuernberg\_17181221-17300630\_dd.tsv
- PALAEO-RA\_Kanold\_Nuernberg\_17181221-17300630\_p.tsv
- README.txt
- plot\_EKFR

The copyright of individual parts of the supplement might differ from the article licence.
